# Supplementary material for: Application of carbon dioxide to the skin and muscle oxygenation of human lower-limb muscle sites during cold water immersion
Source: PeerJ. 2020 Aug 21;8:e9785. doi: 10.7717/peerj.9785 (PMC7444506; doi:10.7717/peerj.9785)
Supplement: File S1 [file peerj-08-9785-s002.xlsx]

## Sheet: MAP
	time	0	5	10	15	20	25	30	35	40	45min
imai	20water	82	88	83	90	86	82	88	81	88	92
ota	20water	84	75	88	84	73	72	75	83	79	73
yamada	20water	94	84	92	87	93	90	96	88	85	82
ushio	20water	88	78	81	78	82	81	84	78	80	80
nishimura	20water	108	112	118	117	96	87	94	102	102	104
kadota	20water	92	93	80	66	82	80	84	86	76	77
okada	20water	87	88	85	90	86	93	79	83	91	81
nagata	20water	88	75	83	77	85	87	91	92	82	81
taniguchi	20water	86	85	83	81	87	87	95	92	92	92
iwai	20water	70	75	83	78	86	79	80	74	80	79
nagai	20water	97	100	81	85	94	79	91	93	101	90
owawa	20water	113	101	102	97	103	96	100	106	109	100
kajiwara	20water	79	78	84	79	84	80	79	76	84	88
uchida	20water	111	98	100	108	90	101	100	103	96	100
fuzita	20water	82	88	83	90	86	82	88	81	88	92
imai	20CO2	94	93	84	88	86	84	96	92	97	95
ota	20CO2	66	72	72	66	65	65	67	67	65	66
yamada	20CO2	93	94	93	103	94	111	95	96	100	101
ushio	20CO2	81	80	81	70	73	78	77	79	77	67
nishimura	20CO2	95	86	102	91	73	100	110	101	108	103
kadota	20CO2	78	90	83	82	82	73	81	80	74	58
okada	20CO2	85	94	94	82	82	93	98	93	91	92
nagata	20CO2	92	86	91	96	95	92	88	96	97	85
taniguchi	20CO2	85	98	92	88	96	94	94	114	101	89
iwai	20CO2	88	80	82	79	76	83	75	77	70	78
nagai	20CO2	91	90	89	101	101	90	98	90	101	93
owawa	20CO2	121	102	109	96	100	94	91	93	96	104
kajiwara	20CO2	74	71	76	73	75	72	78	80	79	75
uchida	20CO2	84	91	93	84	101	87	96	103	88	102
fuzita	20CO2	92	98	87	91	93	84	84	86	89	81

## Sheet: HR
time	0	5	10	15	20	25	30	35	40	45min
20water	71	74	71	66	74	69	71	71	72	68
20water	96	87	92	88	85	86	86	89	83	88
20water	74	79	67	77	68	75	73	79	75	68
20water	75	66	76	66	65	66	68	70	67	72
20water	101	80	86	103	92	97	97	90	94	92
20water	78	77	59	73	54	57	63	72	61	64
20water	87	89	92	81	85	94	79	87	85	83
20water	77	65	67	68	71	72	78	83	78	87
20water	85	80	75	75	79	75	89	85	79	96
20water	64	58	71	67	57	65	75	69	71	67
20water	48	55	51	72	55	53	51	52	53	53
20water	84	95	89	88	81	81	85	77	96	83
20water	73	85	87	87	87	85	81	84	77	88
20water	89	92	78	78	75	80	80	83	70	80
20water	74	76	75	72	82	74	75	75	80	69
20CO2	85	81	71	83	81	75	76	78	76	72
20CO2	78	85	82	75	83	74	84	76	78	76
20CO2	76	76	72	71	72	77	76	70	81	73
20CO2	65	69	66	65	71	67	66	71	60	67
20CO2	81	76	81	81	82	87	78	80	81	84
20CO2	55	67	70	63	66	67	59	58	59	62
20CO2	88	89	89	81	88	85	95	92	96	92
20CO2	75	78	68	67	72	73	72	74	78	75
20CO2	70	93	76	73	71	71	70	92	79	74
20CO2	75	82	69	78	66	64	74	65	76	77
20CO2	66	58	65	66	63	61	55	62	53	56
20CO2	81	71	90	77	84	90	78	85	81	79
20CO2	71	62	76	64	81	82	72	79	69	64
20CO2	65	71	63	66	66	69	65	63	65	72
20CO2	72	68	69	70	72	75	75	71	79	71
												20CO2

## Sheet: Tcore deg
time	0	5	10	15	20	25	30	35	40	45min
20water	37.2	37	37.1	37.4	36.8	36.9	36.6	37	36.6	36.9
20water	36.18	35.75	35.81	36.34	36.4	36.52	36.36	36.11	36.33	36.54
20water	36.24	36.23	35.76	35.98	36.63	36.24	36.22	36.44	36.38	36.2
20water	36.28	36.19	35.97	36.39	36.51	36.59	36.78	36.36	36.62	36.3
20water	37.14	36.48	36.92	36.96	36.69	36.92	36.99	36.25	37.08	36.5
20water	36.46	36.05	36.53	36.54	36.33	36.81	36.67	36.14	36.32	36.61
20water	36.76	36.75	36.77	36.67	36.87	36.48	36.8	36.61	36.91	36.93
20water	36.76	36.67	36.68	36.63	36.91	36.75	36.81	36.69	36.47	36.73
20water	36.6	36.4	36.5	35.8	36.2	36.4	36.6	36.6	36	36.3
20water	37.18	36.84	36.87	36.91	37.31	36.99	37.18	37	36.99	36.85
20water	36.41	36.23	36.07	36.43	36.48	36.44	36.41	36.7	36.58	36.24
20water	36.82	36.97	36.89	36.93	36.89	36.96	36.99	36.95	36.68	36.82
20water	35.95	36.21	36.31	36.16	36.47	36.46	36.49	36.26	36.23	36.35
20water	36.01	36.33	35.91	35.86	35.92	35.96	35.87	36.24	36.5	35.99
20water	36.73	36.83	36.67	36.9	36.93	36.78	36.71	36.77	36.64	36.67
20CO2	36.85	36.69	36.98	36.95	36.84	36.88	36.66	36.6	36.69	36.59
20CO2	36.35	36.08	36.26	35.89	36.51	36.15	35.76	35.9	36.59	36.01
20CO2	36.29	36.28	35.97	35.92	36.23	36.01	35.9	35.95	36.25	36.3
20CO2	36.25	36.14	36.38	36.62	36.36	36.39	36.34	36.72	36.37	36.55
20CO2	36.72	36.59	36.3	36.74	36.8	36.64	36.8	36.4	36.68	36.65
20CO2	36.03	36.05	36.02	35.96	35.36	36.16	35.59	35.77	35.9	36.23
20CO2	36.35	36.69	36.31	36.29	36.64	36.65	36.27	36.33	36.57	36.64
20CO2	37.15	37.09	37.2	36.83	37.35	37.19	37.16	37.29	37.14	37.11
20CO2	36.9	36.7	36.7	36.6	36.7	36.5	36.8	36.7	36.6	36.3
20CO2	37.1	36.55	36.91	36.86	36.87	36.87	37.04	37.13	36.87	36.85
20CO2	36.49	36.32	36.38	36.49	36.41	36.78	36.55	36.65	36.24	36.53
20CO2	36.8	36.84	36.74	36.76	36.95	36.86	37.11	37.07	36.96	36.92
20CO2	36.29	36.03	36.46	36.16	36.12	36.45	36.03	36.31	36.05	36.33
20CO2	35.77	35.54	35.81	35.71	35.34	35.3	35.72	35.82	35.57	35.95
20CO2	37.2	37.32	37.42	37.86	37.57	37.44	37.1	37.43	36.96	37.18

## Sheet: Thermo score
time	0	5	10	15	20	25	30	35	40	45min
20water	-1	-1	-1	-1	-1	-2	-2	-2	-1	-1
20water	0	0	0	0	0	0	0	0	0	0
20water	0	0	0	0	0	0	0	0	0	0
20water	0	0	0	-1	-1	-2	-1	0	0	0
20water	0	0	0	-1	-1	-1	-1	-1	0	0
20water	2	1	0	-2	-1	0	0	0	0	0
20water	0	0	0	-1	-1	-1	-1	0	0	0
20water	0	0	0	-1	-1	-1	-1	0	0	0
20water	0	0	0	0	0	0	0	0	0	0
20water	1	1	1	1	1	1	0	0	0	0
20water	0	0	0	0	0	0	0	0	0	0
20water	0	0	0	0	0	0	0	0	0	0
20water	0	0	0	-2	-1	0	0	0	0	0
20water	1	1	1	0	0	0	0	0	0	0
20water	0	0	0	0	0	0	0	0	0	0
20CO2	0	0	0	0	0	0	0	0	0	0
20CO2	0	0	0	0	0	0	0	0	0	0
20CO2	-1	0	0	-2	-2	-1	-1	-1	0	-1
20CO2	0	0	0	0	0	0	0	0	0	0
20CO2	0	0	0	0	0	0	0	0	0	0
20CO2	0	0	0	-1	-1	-1	-1	-1	0	0
20CO2	0	0	0	-1	-1	-1	0	0	1	0
20CO2	0	0	0	0	0	0	0	0	0	0
20CO2	2	1	1	1	0	0	0	-1	-1	-1
20CO2	0	0	0	-2	-1	-1	0	0	0	0
20CO2	0	0	0	0	0	0	0	0	0	0
20CO2	0	0	0	-1	-1	-1	-1	0	1	0
20CO2	0	0	0	-1	-1	0	0	0	0	0
20CO2	1	1	0	0	0	0	1	1	0	0
20CO2	1	1	1	1	1	1	1	1	1	1

## Sheet: Tsk-WI
time	BL	WI3	WI6	WI9	WI12	WI15	rec3	rec6	rec9	rec12	rec15	rec18
20water	32.7767	23.326	22.3373	22.1573	22.0573	22.0593	24.8773	26.132	26.584	26.6673	26.6533	26.8467
20water	32.3193	25.372	23.848	23.3567	22.9327	22.8573	25.0713	25.8867	26.1427	26.104	26.114	26.4527
20water	30.81	22.988	22.0247	21.4973	21.396	21.162	23.0573	23.6807	23.9647	24.2007	24.4233	24.874
20water	32.0513	23.002	21.9893	21.5493	21.3447	21.156	23.7013	24.332	25.1687	25.7753	26.0713	26.9687
20water	33.514	22.47	21.84	21.5667	21.376	21.2653	24.3587	25.356	25.9607	26.322	26.5593	26.8507
20water	32.692	26.4407	23.9787	22.93	22.2287	22.0293	23.6393	24.8653	25.302	25.314	25.4233	25.5853
20water	32.6673	25.7107	23.5567	22.904	22.5947	22.3127	23.3967	24.308	25.1893	26.1267	26.1587	26.1733
20water	32.2933	25.214	22.9433	22.4447	22.0393	21.8627	23.2033	24.5147	25.1753	25.698	26.0933	26.2407
20water	30.7447	23.2607	22.878	23.0733	23.132	22.8773	24.592	26.0173	26.2807	26.4453	26.6147	26.7707
20water	32.1913	23.8047	21.6807	20.916	20.994	20.8933	22.8633	24.3987	25.2333	25.6313	25.7273	25.8753
20water	31.5673	22.8587	22.3113	21.8953	21.7113	21.5627	23.444	24.2447	24.6707	24.956	25.136	25.352
20water	32.7573	27.7667	23.4627	22.368	21.8827	21.7387	23.7287	25.2893	26.3007	26.804	27.27	27.5573
20water	32.55	23.3813	22.2667	21.794	21.5167	21.4253	24.0727	25.4	26.1887	26.5367	26.8833	26.9673
20water	32.4833	24.756	23.4367	22.8447	22.4693	22.1513	24.5747	25.4207	25.8073	26.2	26.576	27.0167
20water	29.0233	23.7013	22.7273	22.5007	21.986	21.9007	23.0347	24.5607	25.208	25.588	25.9227	26.248
20CO2	30.7153	24.438	23.352	22.9213	22.6773	22.4707	24.5527	25.1847	25.4647	25.5787	25.6507	25.68
20CO2	31.0987	23.3647	22.668	22.33	22.14	21.942	23.7547	23.9653	23.8747	23.8707	23.8853	24.166
20CO2	31.4113	28.4153	24.154	23.228	22.788	22.5133	23.828	24.696	25.372	25.7147	26.2093	26.5773
20CO2	31.9907	23.8907	22.7273	22.494	22.2673	22.1573	23.9007	25.0867	25.6293	25.774	25.7853	25.788
20CO2	32.2807	23.5767	22.224	21.84	21.7353	21.632	23.5447	24.576	24.8133	25.2667	25.542	25.8153
20CO2	31.7933	24.0807	22.4867	22.2333	21.979	21.7453	23.756	24.8367	25.382	26.082	26.5487	26.8453
20CO2	31.032	23.49	21.878	21.1553	21.0733	20.93	22.0327	22.874	23.464	23.924	24.4247	24.75
20CO2	31.3053	22.59	21.6707	21.2687	21.2393	21.1473	22.8147	23.996	24.6313	24.998	25.278	25.4047
20CO2	32.7573	27.7667	23.4627	22.368	21.8827	21.7387	23.7287	25.2893	26.3007	26.804	27.27	27.5573
20CO2	32.408	24.036	22.716	22.2353	21.9187	21.7227	23.4287	24.7893	25.2893	25.574	25.6507	25.9407
20CO2	32.422	23.7707	22.5947	22.29	22.0647	21.7927	24.1087	25.3527	25.7187	26.2087	26.3073	26.3767
20CO2	32.566	27.7953	22.9787	22.2827	21.7913	21.5867	21.6993	24.1493	24.72	25.238	25.6127	25.9473
20CO2	32.4193	23.8373	22.3613	22.1027	21.866	21.676	24.7287	25.6867	26.004	25.99	25.764	25.4027
20CO2	31.5707	25.102	22.8173	22.5167	22.2833	22.256	23.8713	24.552	24.7893	24.93	25.2153	25.5133
20CO2	31.8408	24.7253	22.7208	22.2333	21.979	21.8079	23.5535	24.6453	25.1038	25.4252	25.6531	25.8403

## Sheet: Tsk-cont
time	BL	WI3	WI6	WI9	WI12	WI15	rec3	rec6	rec9	rec12	rec15	rec18
20water	31.404	31.2887	31.264	31.4073	31.1893	30.6113	30.474	30.514	30.5273	30.5487	30.4587	30.7013
20water	32.316	32.3293	32.226	32.076	31.9933	32.018	32.074	32.1847	32.0053	31.9527	31.8993	31.8627
20water	31.3073	31.4127	31.3853	31.1693	31.0387	31.11	31.2147	31.02	30.8853	30.8653	30.92	31.206
20water	32.798	32.964	32.8693	32.85	32.8307	32.612	32.6193	32.712	32.644	32.1413	31.9673	32.2773
20water	31.0087	31.0927	31.2913	31.458	31.6313	31.3567	31.1107	30.802	30.5367	30.376	30.3867	30.28
20water	30.574	30.1193	29.872	31.6764	31.6388	30.3253	31.3	31.302	31.126	30.9853	30.7947	30.7427
20water	31.8967	32.0287	32.0343	31.9007	31.79	31.5907	31.7907	31.918	31.766	31.5653	31.6967	31.3833
20water	32.224	31.96	31.8647	31.6947	31.5593	31.332	31.33	31.364	31.288	31.1193	31.0813	30.97
20water	31.0567	30.534	30.6213	30.406	30.3733	30.258	30.0953	30.26	30.524	31.184	30.6347	30.2527
20water	32.082	31.7127	31.46	31.57	31.5613	31.5133	31.2887	31.436	31.344	30.9887	31.0707	30.9507
20water	32.734	32.5213	32.5193	32.2947	32.0993	32.0193	32.1187	32.066	31.9467	31.8487	31.5953	31.7387
20water	31.656	31.556	31.3687	31.366	31.5093	31.8013	31.5627	31.9227	31.8853	31.5013	31.7673	32.2573
20water	31.46	31.5413	31.7113	31.88	31.9647	31.818	31.606	31.2087	30.95	30.7953	30.7053	30.8793
20water	32.2653	31.914	31.6567	31.7207	31.7633	31.8367	31.73	31.608	31.196	30.9913	30.8173	30.92
20CO2	31.178	31.0067	30.868	30.642	30.4967	30.3853	30.3607	30.358	30.3473	30.224	30.1747	30.1353
20CO2	31.458	31.186	31.0073	30.9187	30.7893	30.72	30.3347	30.442	30.394	30.4513	30.5153	30.5007
20CO2	32.7813	32.5113	32.212	32.004	31.7993	31.6293	31.5807	31.4907	31.4067	31.3687	31.332	31.314
20CO2	30.4893	30.818	30.8947	30.8153	30.698	30.6253	30.4807	30.4453	30.304	30.0953	29.944	29.986
20CO2	31.4987	31.3827	31.268	31.0713	31.1387	30.8987	30.842	30.7753	30.142	30.18	30.2167	30.2287
20CO2	32.2233	32.2827	32.7847	31.3512	31.2367	33.322	33.0893	32.72	32.932	32.788	32.9827	32.8527
20CO2	30.5213	30.1453	29.8873	30.0453	29.912	29.7867	29.878	29.8927	29.666	29.6293	29.614	29.4133
20CO2	30.982	30.8013	30.7187	30.6553	30.6353	30.3973	30.3387	30.2307	30.1107	30.0433	30.0693	30.1027
20CO2	32.798	32.964	32.8693	32.85	32.8307	32.612	32.6193	32.712	32.644	32.1413	31.9673	32.2773
20CO2	31.5093	31.546	31.108	30.948	30.6767	30.2713	30.216	29.8353	29.8773	30.1213	30.0507	29.9853
20CO2	32.0893	32.042	32.1067	32.094	31.85	31.8	31.7573	31.722	31.2287	30.9713	30.9447	30.9167
20CO2	32.4487	32.284	32.3193	32.342	32.1713	31.904	31.6733	31.2267	31.2573	31.2027	31.1327	30.9067
20CO2	32.04	31.8653	31.8793	31.8747	32.054	32.0187	31.668	32.554	32.366	32.0847	32.0887	31.7633
20CO2	31.5633	31.462	31.4967	31.3047	31.0247	30.876	30.7233	30.8453	30.878	30.838	30.8287	30.7253

## Sheet: TA low oxy
time	BL	WI3	WI6	WI9	WI12	WI15	rec3	rec6	rec9	rec12	rec15	rec18
20water	0	0.077107	-0.11699	-0.22999	0.028953	0.14364	-0.21508	-0.30659	-0.22709	-0.20286	-0.31101	-0.58019
20water	0	0.091193	0.24418	0.094853	0.124847	0.046287	0.050473	0.06892	0.039953	0.22098	0.079927	0.081407
20water	0	0.334753	0.288187	0.507453	0.247353	0.076387	0.121187	0.131333	0.13534	0.223473	0.23662	0.099933
20water	0	-0.02318	-0.17151	-0.1312	-0.08088	-0.14393	-0.23386	-0.25265	-0.27627	-0.23993	-0.22383	-0.21693
20water	0	-0.05836	-0.06182	-0.00437	0.012073	0.0760017	0.025533	-0.05856	-0.07598	-0.09489	-0.11535	-0.12373
20water	0	0.262633	0.109747	0.151073	0.175013	0.08268	0.13694	0.16002	0.12964	0.011287	0.03934	-0.00609
20water	0	0.150633	0.234547	0.27096	0.22244	0.161167	0.145087	0.0959	0.110387	-0.03238	-0.00401	-0.00585
20water	0	-0.10086	-0.00681	0.516373	0.490727	0.0760017	-0.34675	-0.00319	-0.09108	-0.02917	0.107747	0.11438
20water	0	-0.0484667	0.0883225	0.01548	0.00322	0.08016	-0.05816	-0.11152	-0.0778133	-0.02094	-0.0560733	-0.123433
20water	0	0.0952942	0.0883225	0.136191	0.12137	0.0760017	-0.0205547	-0.00447726	-0.0189667	-0.0226762	-0.0339133	-0.0870383
20water	0	0.207173	0.142167	0.15898	0.176093	0.152633	0.0488667	0.0327067	0.10236	0.0741867	-0.0299933	-0.0632867
20water	0	0.116213	-0.00962033	0.038633	0.005993	0.0760017	0.0975797	0.158006	0.121653	0.0126397	-0.0268137	-0.121707
20water	0	0.0481863	0.194913	0.235633	0.108833	0.0582797	-0.0490203	-0.011307	-0.059487	-0.118267	-0.041947	-0.0637137
20water	0	0.1818	0.21288	0.1466	0.06314	0.102713	0.00999333	0.0387267	-0.07818	-0.09892	-0.09548	-0.122287
20CO2	0	-0.18004	0.15862	0.557227	0.406333	0.20676	0.31086	0.377427	0.37164	0.28594	0.332113	0.224
20CO2	0	0.35324	0.337893	0.263727	0.316147	0.348147	0.040127	-0.32693	-0.19762	-0.30985	-0.46894	-0.42962
20CO2	0	0.161396	0.19122	0.303342	0.224542	0.216716	0.222549	0.211522	0.231309	0.212362	0.193542	0.027149
20CO2	0	0.306487	0.362187	0.261053	0.286407	0.33458	0.560767	0.37608	0.195947	0.06818	-0.127967	-0.00719333
20CO2	0	0.0503603	0.036847	0.0535137	0.016407	0.0812403	-0.139086	-0.114133	-0.142693	-0.172553	-0.164153	-0.172313
20CO2	0	-0.0555663	-0.14502	-0.0752063	-0.0582063	-0.0619597	-0.163053	-0.181533	-0.1918	-0.215053	-0.183406	-0.166
20CO2	0	0.208566	0.359086	0.340546	0.39408	0.4045	0.288853	0.170493	0.088293	0.090213	0.132846	0.229893
20CO2	0	0.0410857	0.07024	0.11692	0.156553	0.217967	0.0399286	0.0344133	-0.0180467	-0.147153	-0.2424	-0.197207
20CO2	0	0.244893	0.23054	0.234647	0.309433	0.29636	0.168573	0.0746867	0.13104	0.12994	0.168887	0.122353
20CO2	0	0.3112	0.310687	0.340467	0.325013	0.306913	0.2508	0.16906	0.210087	0.284827	0.2363	0.134747
20CO2	0	-0.15317	-0.19503	-0.2827	-0.33169	-0.20395	0.176723	-0.33814	-0.38709	-0.58183	-0.52197	-0.47826
20CO2	0	-0.00787367	0.104766	0.0270463	0.0137797	0.180246	0.133076	0.146573	0.0738063	0.0874797	0.133746	0.0907063
20CO2	0	0.637573	0.502373	0.543806	0.42644	0.550453	0.54328	0.687993	0.644206	0.610353	0.420406	0.447713
20CO2	0	0.006067	0.141294	0.0286737	0.0815003	0.102367	0.0407203	-0.062753	0.040287	-0.0393263	-0.0279263	-0.133524

## Sheet: TA low deoxy
time	BL	WI3	WI6	WI9	WI12	WI15	rec3	rec6	rec9	rec12	rec15	rec18
20water	0	0.246793	-0.05557	-0.04237	0.131813	0.19564	-0.3957	-0.31565	-0.02465	0.004633	-0.05226	-0.27985
20water	0	0.174406	0.180173	0.2588	0.3134	0.242886	-0.33001	-0.0722	-0.15921	0.223413	0.166673	0.31362
20water	0	0.295313	0.193367	0.36048	0.508113	0.310727	-0.26508	-0.00677	0.128713	0.457767	0.41674	0.186653
20water	0	0.146133	0.03658	0.101229	0.091072	0.128726	-0.17607	-0.14259	-0.10008	-0.00693	0.014086	0.036166
20water	0	-0.17412	-0.18533	-0.17294	-0.16987	0.0387476	-0.13725	-0.14882	-0.09918	-0.07659	-0.06965	-0.06993
20water	0	0.02894	-0.16727	-0.14075	-0.13063	-0.17765	-0.06997	0.009147	-0.00233	-0.09014	-0.06825	-0.09797
20water	0	-0.04012	-0.03413	-0.09355	-0.091	-0.06232	0.022947	0.0086	0.056713	0.00604	0.031193	0.038453
20water	0	-0.21566	-0.15792	0.24396	0.25522	0.0387476	-0.53879	0.107527	0.151173	0.234813	0.30648	0.57092
20water	0	-0.145253	-0.02197	-0.216566	-0.188253	-0.129413	-0.23318	-0.232566	-0.256133	-0.17158	-0.105053	-0.193686
20water	0	0.07764	0.0687133	0.0405333	0.0768267	0.107773	0.122613	0.211347	0.237287	0.19358	0.17336	0.183447
20water	0	0.02726	-0.12294	-0.08438	-0.10864	0.0387476	0.139007	0.25274	0.225487	0.210373	0.2374	0.176547
20water	0	-0.149953	-0.0573263	-0.00400633	-0.135466	-0.132053	-0.167306	-0.048353	0.0295603	-0.0177063	0.10282	0.129934
20water	0	0.0660533	0.0380133	-0.08666	-0.13498	-0.09684	-0.07074	0.0246133	-0.0606867	-0.0483667	-0.0103867	-0.04682
20CO2	0	-0.0158467	0.24804	0.325773	0.435733	0.2083	0.3961	0.631833	0.697027	0.586913	0.659347	0.625687
20CO2	0	0.21492	0.34372	0.167513	0.194927	0.182267	-0.287	-0.27025	-0.1778	-0.04297	-0.06501	-0.10442
20CO2	0	0.100603	-0.0531879	-0.14235	-0.12403	-0.0587971	0.0695229	0.0810629	0.198596	0.144816	0.250776	0.200536
20CO2	0	-0.236667	-0.264433	-0.0505733	-0.0116133	0.107627	0.158067	0.160867	0.114927	0.235573	0.0351467	0.333593
20CO2	0	-0.140707	-0.257647	-0.3151	-0.323027	-0.241267	-0.359927	-0.2294	-0.240327	-0.232927	-0.172973	-0.172933
20CO2	0	-0.252393	-0.31016	-0.280287	-0.25954	-0.256127	-0.263067	-0.279767	-0.180673	-0.139747	-0.10806	-0.0494
20CO2	0	0.073073	0.193	0.16094	0.152846	0.145926	0.079973	0.0522197	0.0451463	0.104146	0.1685	0.26402
20CO2	0	-0.146253	-0.192087	-0.174593	-0.156867	-0.0881733	-0.178613	-0.0702333	-0.0915467	-0.120513	-0.17704	-0.142893
20CO2	0	0.0859133	0.00209333	-0.00439333	0.0766533	0.0891333	-0.0221667	-0.0616667	-0.0341533	0.00761333	0.0282733	-0.02208
20CO2	0	0.157607	0.102453	0.179267	0.139833	0.142587	0.134033	0.155413	0.272533	0.398847	0.4071	0.333607
20CO2	0	-0.13508	-0.0516263	-0.184293	-0.184533	-0.104633	-0.0827186	0.0322337	0.067847	0.111394	0.19016	0.172514
20CO2	0	0.158413	0.194773	0.152593	0.063813	0.0887797	-0.0440137	0.44918	0.511886	0.561286	0.530466	0.6088
20CO2	0	-0.0621	-0.0244067	-0.123373	-0.10074	-0.105853	-0.111753	-0.142267	-0.0602067	-0.06378	-0.0340667	-0.0316687

## Sheet: TA low total
time	BL	WI3	WI6	WI9	WI12	WI15	rec3	rec6	rec9	rec12	rec15	rec18
20water	0	0.311017	-0.17253	-0.2722	0.16039	0.33653	-0.61057	-0.62156	-0.25158	-0.19814	-0.36296	-0.85928
20water	0	0.265533	0.423693	0.35324	0.437566	0.288293	-0.27909	-0.00351	-0.11925	0.443686	0.245806	0.3941
20water	0	0.62874	0.4807	0.56638	0.754253	0.386307	-0.14425	0.123993	0.263293	0.679887	0.652047	0.28574
20water	0	0.122607	-0.13487	-0.03008	0.01003	-0.01537	-0.40967	-0.395	-0.37619	-0.24683	-0.20979	-0.18062
20water	0	-0.23258	-0.24679	-0.17716	-0.15776	0.104304	-0.11153	-0.20708	-0.17499	-0.17113	-0.18514	-0.19354
20water	0	0.290907	-0.05743	0.010193	0.044113	-0.09484	0.06632	0.168367	0.127087	-0.07943	-0.02912	-0.10408
20water	0	0.110063	0.19933	0.17639	0.130603	0.09809	0.167683	0.104217	0.16669	-0.02625	0.02713	0.031917
20water	0	-0.31601	-0.16443	0.75918	0.744853	0.104304	-0.88442	0.104233	0.060087	0.205207	0.41368	0.684293
20water	0	-0.193727	0.057841	-0.200887	-0.185447	-0.0493537	-0.291527	-0.34358	-0.333714	-0.192454	-0.16158	-0.31694
20water	0	0.184633	0.11118	0.100066	0.15326	0.160726	0.0718397	0.144013	0.239413	0.16778	0.0438797	0.0206663
20water	0	0.14292	-0.132373	-0.0455467	-0.1029	0.104304	0.2364	0.410373	0.346627	0.222813	0.209833	0.05494
20water	0	-0.102407	0.136986	0.130993	-0.026827	-0.0738203	-0.21632	-0.0599937	-0.0302603	-0.13606	0.0604597	0.0658597
20water	0	0.248033	0.250627	0.0598733	-0.07128	0.00647333	-0.0599133	0.0637933	-0.138293	-0.14704	-0.105613	-0.168273
20water	0	0.112287	0.057841	0.110034	0.14545	0.104304	-0.189619	-0.0393642	-0.0170062	0.0401568	0.0460486	-0.0219398
20CO2	0	-0.195813	0.40598	0.8811	0.840474	0.4142	0.70492	1.00721	1.06681	0.871114	0.989127	0.848
20CO2	0	0.567033	0.6808	0.430607	0.510627	0.5297	-0.2463	-0.59595	-0.37475	-0.35215	-0.53291	-0.53291
20CO2	0	0.261662	0.137652	0.160562	0.100155	0.157589	0.291615	0.292195	0.428975	0.356315	0.443329	0.227375
20CO2	0	0.06966	0.09756	0.209893	0.274133	0.44074	0.717367	0.535867	0.3103	0.30304	-0.0927933	0.325667
20CO2	0	-0.0902133	-0.2205	-0.261293	-0.306227	-0.159773	-0.49884	-0.3431	-0.382513	-0.404933	-0.336727	-0.344807
20CO2	0	-0.307887	-0.45486	-0.3553	-0.31766	-0.3179	-0.425833	-0.461067	-0.37286	-0.354473	-0.291387	-0.215673
20CO2	0	0.281447	0.55158	0.500933	0.546547	0.549513	0.368	0.2221	0.13338	0.1941	0.30102	0.493453
20CO2	0	-0.10768	-0.121367	-0.0574	-0.000646667	0.129273	-0.141107	-0.0354267	-0.10958	-0.267407	-0.41908	-0.339653
20CO2	0	0.330973	0.233807	0.23148	0.387047	0.3863	0.147627	0.0143533	0.0981667	0.13878	0.197893	0.10136
20CO2	0	0.467933	0.412307	0.51882	0.463347	0.448207	0.384027	0.323647	0.481467	0.682327	0.64218	0.4675
20CO2	0	-0.32085	-0.54057	-0.78693	-0.81159	-0.60873	0.136909	-0.69531	-0.65492	-0.9832	-0.78807	-0.66558
20CO2	0	-0.14268	0.0530267	-0.157333	-0.169907	0.07588	0.0507033	0.17874	0.141853	0.198953	0.323713	0.26332
20CO2	0	0.794947	0.696154	0.694807	0.489134	0.638227	0.49844	1.13511	1.15359	1.16969	0.94878	1.05479
20CO2	0	-0.0557737	0.117226	-0.0942803	-0.019027	-0.003507	-0.070807	-0.20462	-0.0199337	-0.10244	-0.061687	-0.165081

## Sheet: TA deep oxy
time	BL	WI3	WI6	WI9	WI12	WI15	rec3	rec6	rec9	rec12	rec15	rec18
20water	0	-0.086452	-0.239572	-0.307452	-0.123632	-0.062852	-0.360945	-0.346259	-0.113859	-0.159725	-0.244252	-0.372745
20water	0	0.0150067	0.17226	0.0456267	0.05646	0.0371267	-0.08086	-0.0435867	0.0116067	0.116233	-0.0173533	-0.0614733
20water	0	0.169207	0.151	0.14464	0.22294	0.36364	0.0420667	0.0609334	0.0433667	-0.0259933	-0.0207933	0.0756
20water	0	0.172914	0.09533	0.1464	0.158152	0.177024	-0.00498	-0.01297	-0.03157	-0.01303	-0.00351	-0.01085
20water	0	0.24458	0.22193	0.073441	0.098393	0.104691	0.14093	-0.01611	0.136586	0.061944	0.109573	-0.06602
20water	0	-0.02648	0.0628899	0.000266667	-0.0141667	0.02564	0.0603067	0.0502	0.14592	0.17282	-0.17738	-0.10466
20water	0	0.125879	0.350753	0.256286	0.308106	0.252739	0.415933	0.261879	0.239519	0.226479	0.273073	0.393459
20water	0	-0.141759	-0.128139	-0.165859	-0.170232	0.104691	-0.410326	-0.398432	-0.426119	-0.454439	-0.461772	-0.490959
20water	0	-0.0466797	-0.0817263	-0.0898863	-0.0482997	-0.0887597	-0.0855797	-0.0937997	-0.149833	0.0554137	0.0486937	-0.0326197
20water	0	-0.00499933	0.024174	0.0467873	0.197687	0.132967	0.126661	0.100434	0.105674	0.091934	0.0706273	0.013194
20water	0	0.0421217	0.0628899	0.015025	0.0685408	0.104691	-0.0156794	-0.0437711	-0.0038708	0.00716367	-0.0423094	-0.0657074
20CO2	0	0.259947	0.0659399	-0.0401601	0.0117732	0.193853	0.0500732	-0.0176401	0.0259066	0.0284066	0.00227323	0.0186266
20CO2	0	-0.023094	-0.063359	-0.147967	-0.131333	-0.008733	-0.048127	0.03847	0.01544	0.03387	-0.00184	-0.0294
20CO2	0	0.153083	0.0966988	0.109497	0.0888701	0.00276343	-0.0716566	-0.0556832	-0.0817632	-0.0726699	-0.0623566	-0.0639232
20CO2	0	0.361513	0.301627	0.28488	0.332167	0.268873	0.272967	0.493093	0.400373	0.0995133	0.702767	0.656273
20CO2	0	0.0490797	0.150326	0.10954	0.144993	0.139066	-0.24242	-0.240667	-0.246267	-0.16118	-0.11166	-0.164074
20CO2	0	0.0872197	0.0730863	0.113593	-0.003887	0.0338263	-0.0794937	-0.083347	-0.107187	-0.042427	-0.0245137	-0.059907
20CO2	0	0.60718	0.705993	0.60444	0.760546	0.519073	0.593506	0.74484	0.718133	0.68368	0.65902	0.43584
20CO2	0	-0.024419	0.0224667	0.0299333	0.301593	0.24186	0.385311	0.0396267	-0.0256733	-0.0236467	-0.0163467	0.0493933
20CO2	0	-0.0422533	-0.0109267	0.123447	0.106393	0.0668533	0.247667	0.34094	0.3136	0.2677	0.270193	0.25038
20CO2	0	-0.13587	-0.15455	0.00296	-0.05565	-0.08673	0.144675	-0.02472	-0.06381	-0.00199	-0.22041	-0.1216
20CO2	0	-0.125179	-0.127726	-0.0918857	-0.0380057	0.409634	0.338927	0.608814	0.641674	0.576161	0.526748	0.503308

[truncated: 17 more sheets: TA deep deoxy, TA deep total, GAS low oxy, GAS low deoxy, GAS low total, GAS deep oxy, GAS deep deoxy, GAS deep total, StO2 TA low, StO2 TAdeep, StO2 GAS low, StO2 GAS deep, ▵StO2TAlow, ▵StO2TA deep, ▵StO2 GAS low, ▵StO2 GAS deep, Table 1]
