# Supplementary material for: Application of carbon dioxide to the skin and muscle oxygenation of human lower-limb muscle sites during cold water immersion
Source: PeerJ. 2020 Aug 21;8:e9785. doi: 10.7717/peerj.9785 (PMC7444506; doi:10.7717/peerj.9785)
Supplement: File S2 [file peerj-08-9785-s003.xlsx]

## Sheet: Sheet1
subj.	A	B	C	D	E	F	G	H	I	J	K	L	M	N	O
PAS	La	13.6	11	8.1	10.3	4.5	7.2	8.1	4	12.4	11.9	13.1	16.1	5.6	17.5
	WE(2-1)	-0.785661	6.60951	-0.801814	1.73792	0.398034	0.615979	-1.27281	4.33318	1.52211	2.84378	-1.34623	1.0306	-1.12458	0.892722
	HR	101	101	115	121	100	95	107	104	91	82	78	92	85	83
CCWI	La	7	6.5	7.4	8.6	6.2	9.3	6.8	4.8	7.9	8.3	8.5	10.5	6.9	10.6
	WE(2-1)	-2.47846	0.420908	0.294749	-0.158574	2.95254	-1.80154	3.41785	2.63001	-0.311773	2.17629	1.97957	1.19641	-0.811464	-0.286885
	HR	87	84	99	98	78	76	83	89	73	78	76	93	79	69
CWI	La	9.6	7.3	6.7	12.4	5.4	7.6	7.7	5	6.7	13.9	11.4	10.2	7.2	11.3
	WE(2-1)	-1.77224	0.807294	-1.22659	2.0354	-1.85755	2.52859	1.30264	2.03703	2.34362	0.472486	0.76951	3.42738	0.336333	1.96925
	HR	94	86	117	103	88	83	95	108	91	86	85	91	88	78
